# Supplementary material for: The segregation resistance of the Pt2ML/Os/Pd3Al sandwich catalyst for oxygen reduction reaction: a density functional theory study
Source: Royal Society of Chemistry journal article supplement (doi:10.1039/c6cp05869h), 2016-01-01
Supplement: c6cp05869h1.pdf [file c6cp05869h1.pdf]

## Supplementary Information

*for*

### **The segregation resistance of the sandwich Pt<sub>2ML</sub>/Os/Pd<sub>3</sub>Al catalyst for oxygen reduction reaction: A Density Functional Theory Study**

B. B. Xiao<sup>a</sup>, X. B. Jiang<sup>b</sup>, X. L. Yang<sup>a\*</sup>, Q. Jiang<sup>c\*</sup>, F. Zheng<sup>a,d</sup>

*<sup>a</sup>School of Energy and Power Engineering, Jiangsu University of Science and  
Technology, 212003, Zhenjiang, Jiangsu, China*

*<sup>b</sup>School of Materials Science and Engineering, Jiangsu University of Science and  
Technology, 212003, Zhenjiang, Jiangsu, China*

*<sup>c</sup>Key Laboratory of Automobile Materials, Ministry of Education, and Department of  
Materials Science and Engineering, Jilin University, 130022, Changchun, China*

*<sup>d</sup>Research Center of Zhongjing New Energy Science & Technology, 212003,  
Zhenjiang, Jiangsu, China*

---

\* Corresponding authors.

Prof. Jiang, Q. E-mail: jiangq@jlu.edu.cn; Fax: +86-431-85095371

Prof. Yang, X. L. E-mail: hcyangxl2010@just.edu.cn; Fax: +86-511-84411906

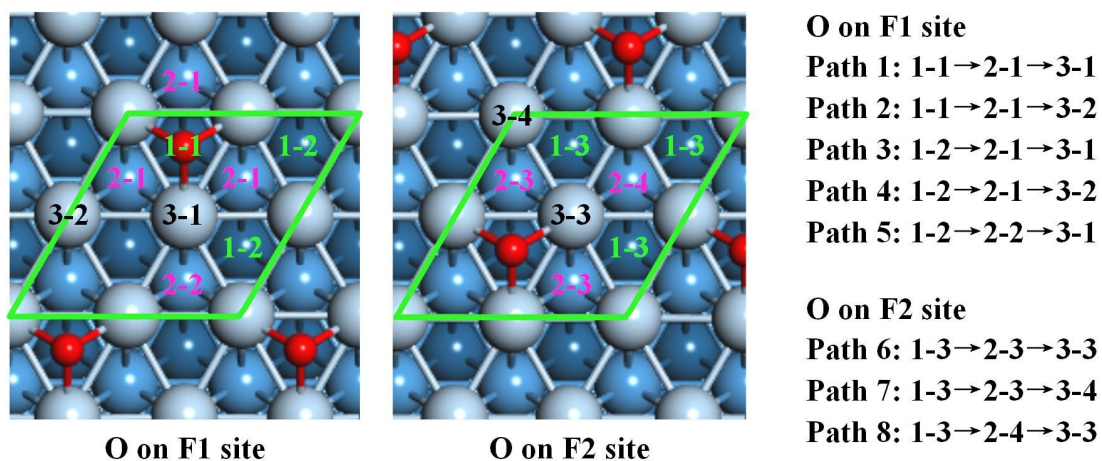

**Figure S1.** Schematic showing the Al segregation paths under different O adsorption sites. The different Al configuration in the N layer, denoted as N-M. The possibility paths are five and three for O adsorption on F<sub>1</sub> and F<sub>2</sub> sites, respectively.
